# Supplementary material
Source: publisher figshare collection journal article supplement (https://tandf.figshare.com/articles/dataset/_/4730299)

$F_1(\lambda_1, \lambda_2)$  Surface (GFGL)

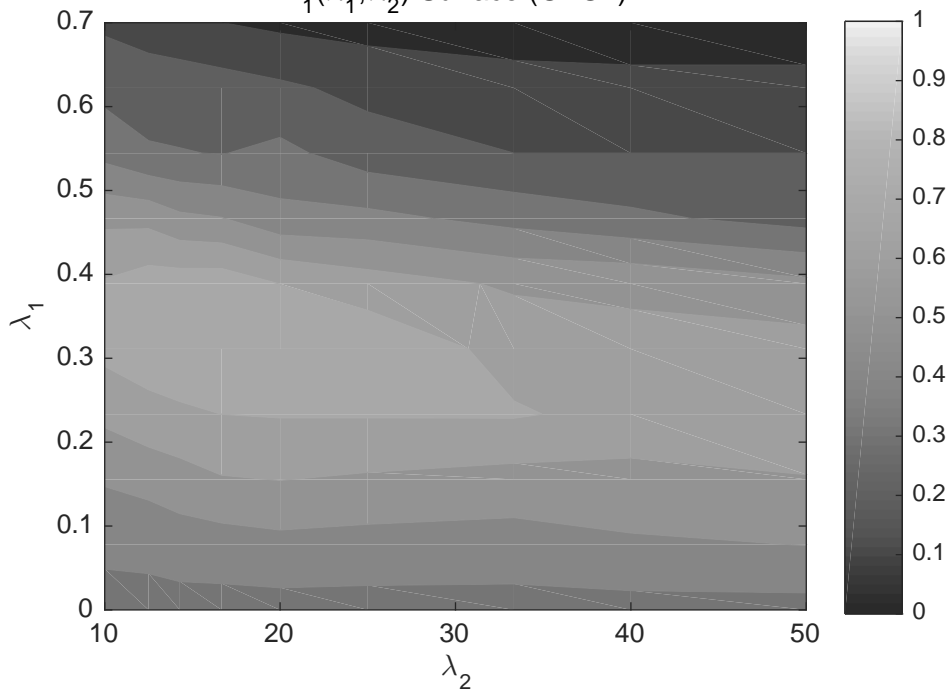

Supplement: Supplementary file 1 [file 1]

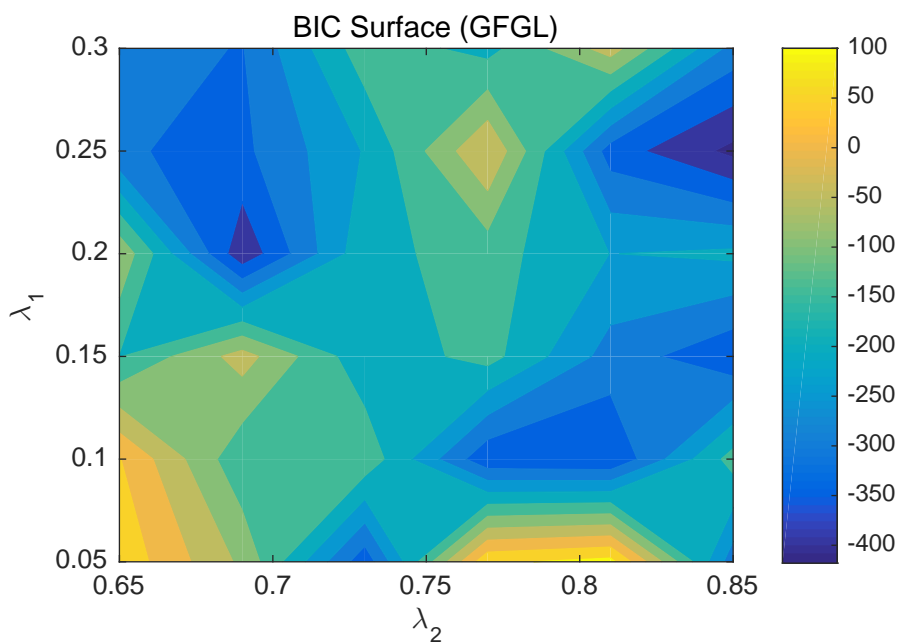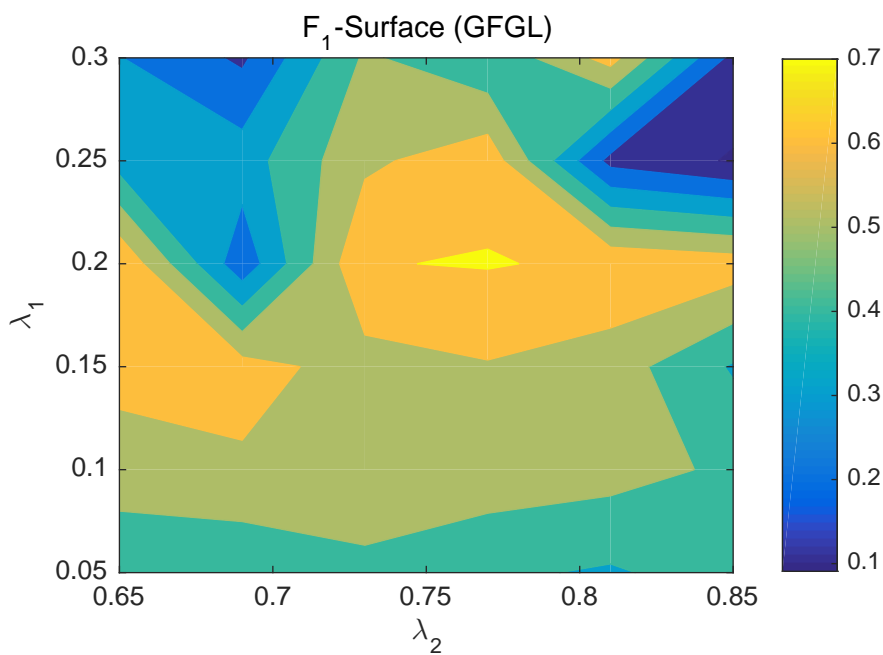

Supplement: Supplementary file 2 [file 1]

$F_1(\lambda_1, \lambda_2)$  Surface (GFGL)

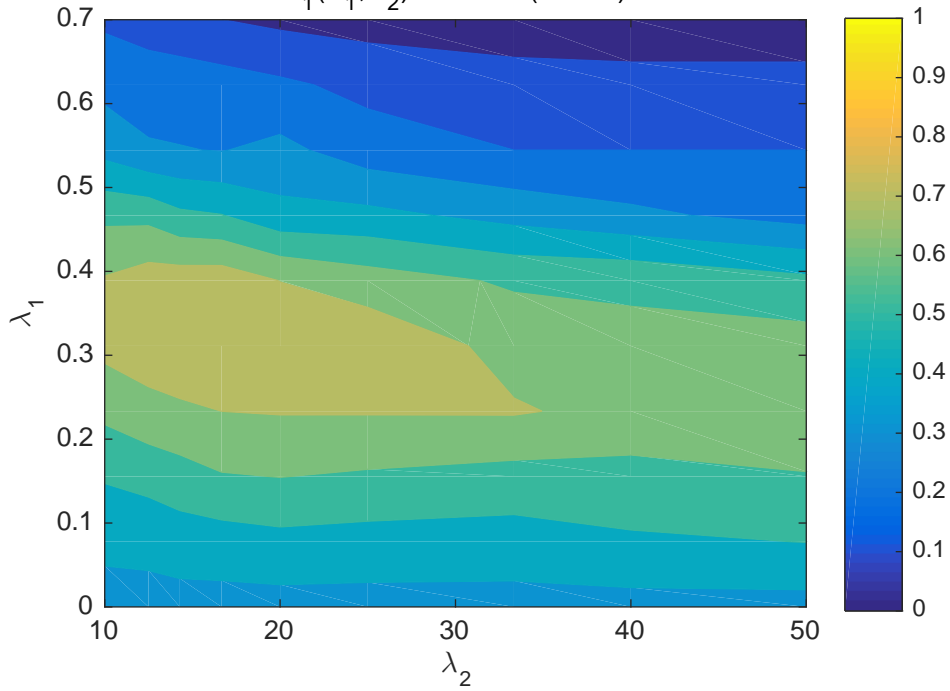

Supplement: Supplementary file 3 [file 1]

$F_1(\lambda_1, \lambda_2)$  Surface (IFGL)

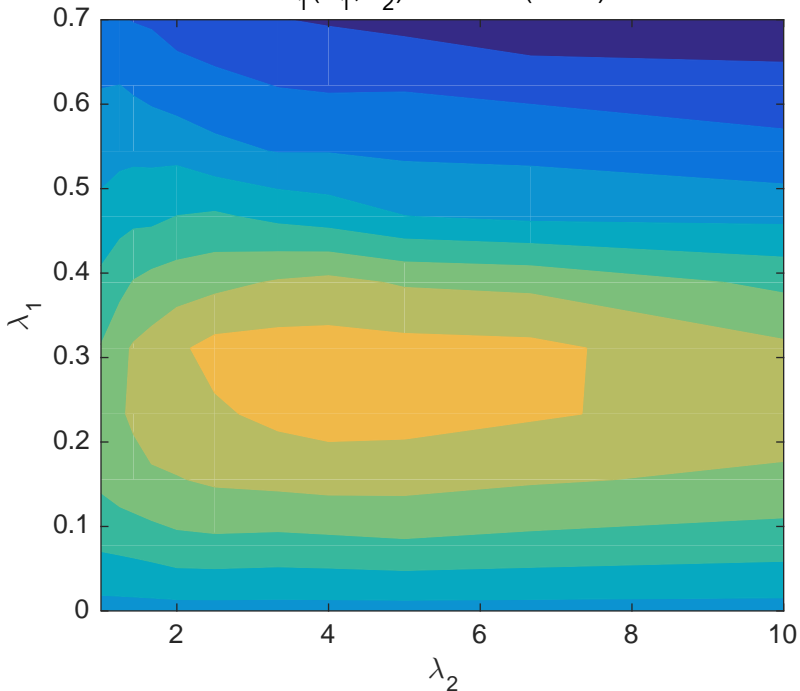

Supplement: Supplementary file 4 [file 1]

BIC Surface (IFGL)

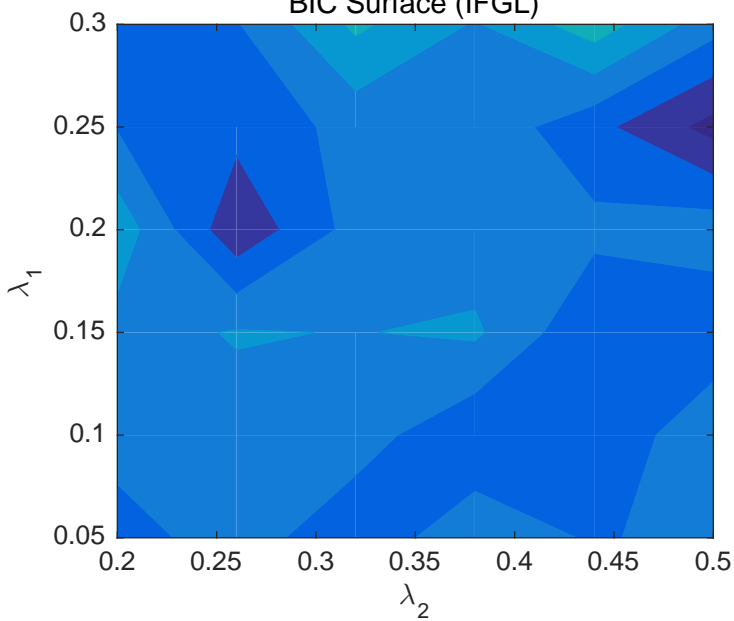

$F_1$ -Surface (IFGL)

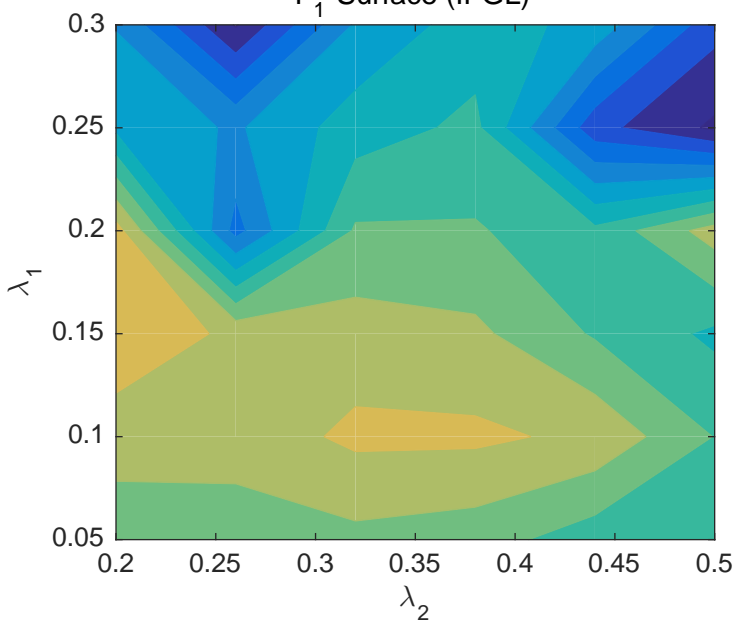

Supplement: Supplementary file 5 [file 1]

BIC Surface (IFGL)

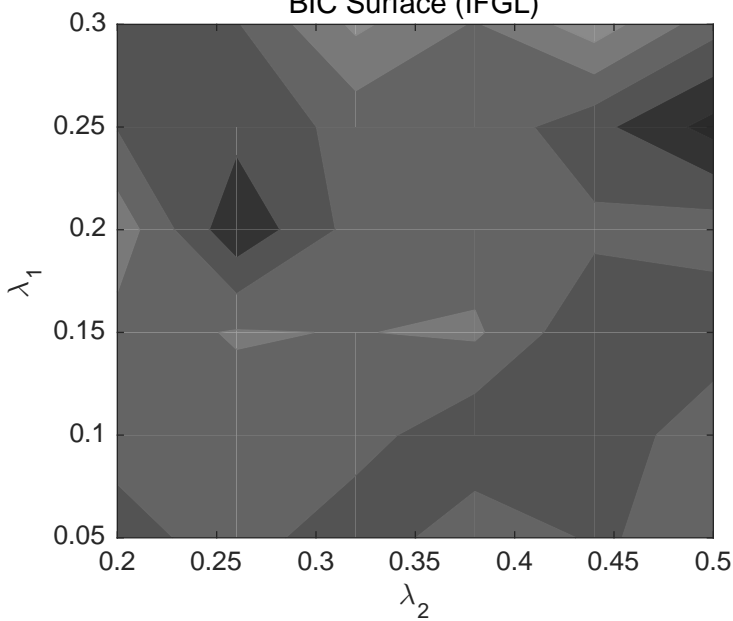

$F_1$ -Surface (IFGL)

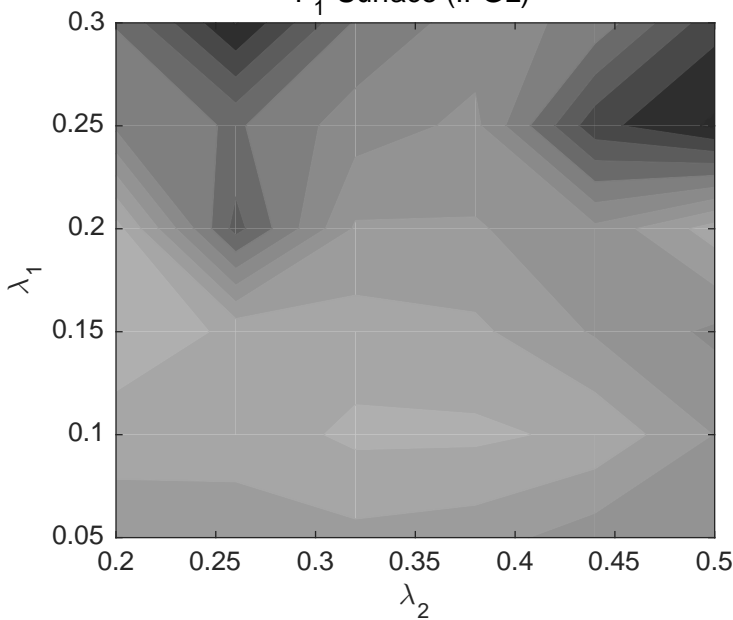

Supplement: Supplementary file 7 [file 1]

$F_1(\lambda_1, \lambda_2)$  Surface (IFGL)

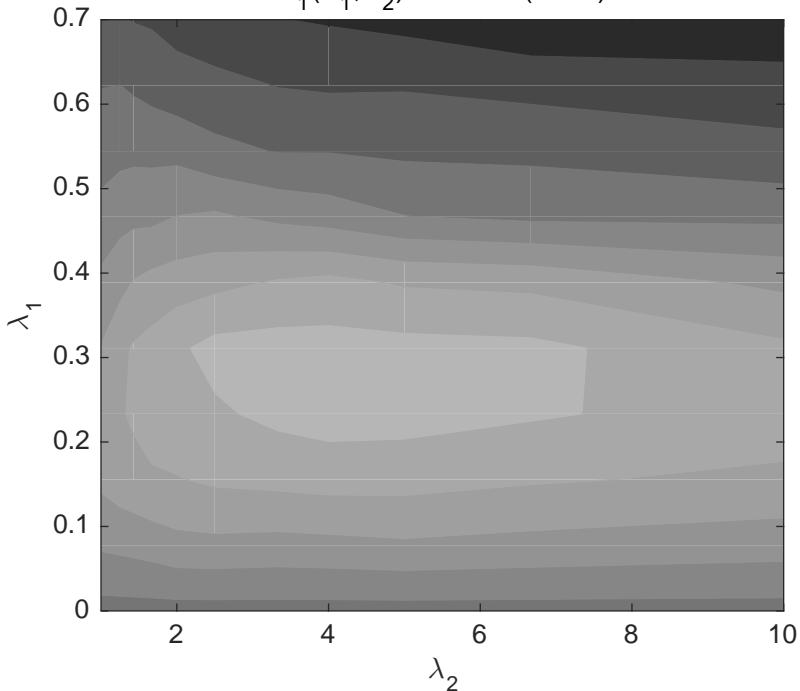

Supplement: Supplementary file 8 [file 1]

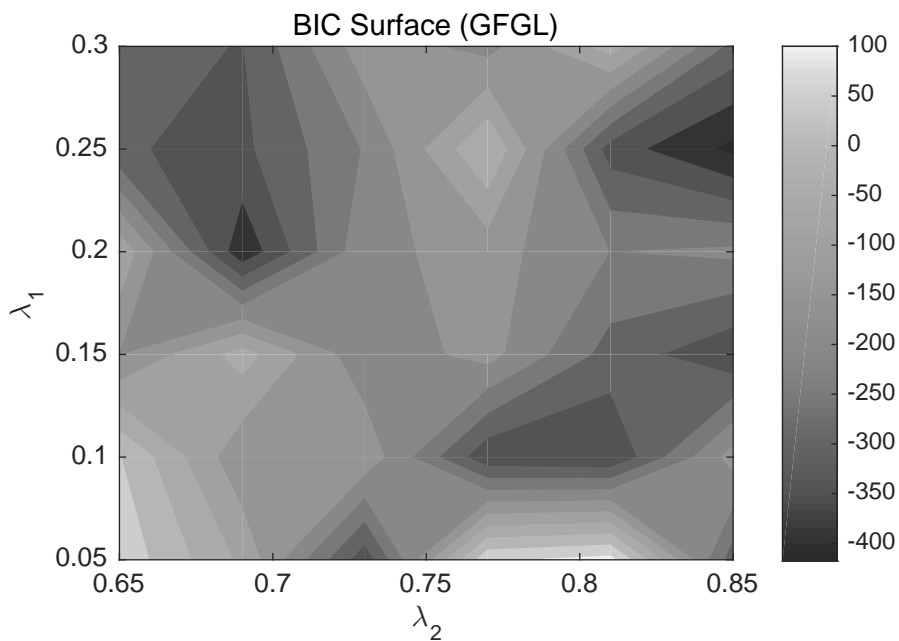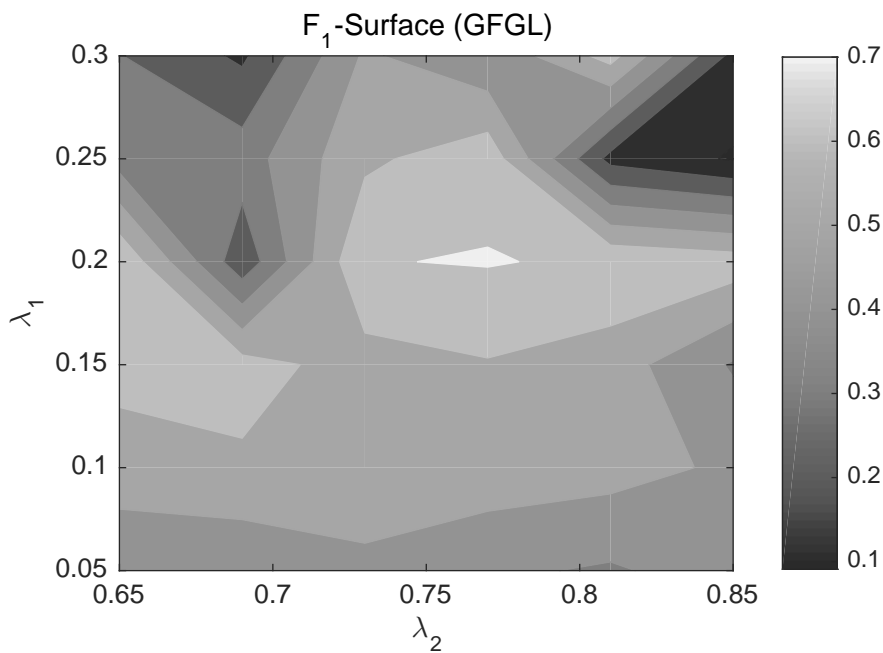

Supplement: Supplementary file 9 [file 1]
